# Supplementary material for: Old maids have more appeal: effects of age and pheromone source on mate attraction in an orb-web spider
Source: PeerJ. 2016 Apr 18;4:e1877. doi: 10.7717/peerj.1877 (PMC4841224; doi:10.7717/peerj.1877)
Supplement: Data S1 [file peerj-04-1877-s001.xlsx]

## Sheet: Tabelle1
ID of females	Trial	Age class	Post-mature age	Adult date	Adult weight (mg)	Test weight (mg)	Tibia-Patella-length (mm)	Condition on test day	Condition on day of sexual maturity	Test date	ID of neutral webs	Female was visited?	Number of male visitors	Start time	Daytime	Weather	Early test termination (min) < 120 minutes	Data used for binary tests	Data used for male frequency tests	Data used for paired comparison (web vs. Female body)/ male frequency
13	web	young females	1	2012-07-12	115.7	115.7	6.93	-0.196089	-6.63428	2012-07-12	NA	No	0	15:14:00	afternoon	rainy	NA	Yes	No	yes
13	female	young females	1	2012-07-12	115.7	115.7	6.93	-0.222207	-7.10679	2012-07-12	25	Yes	2	11:00:00	midday	rainy	NA	Yes	yes	yes
17	web	old females	15	2012-07-10	98.1	279.4	6.41	0.827751	-3.90706	2012-07-24	NA	Yes	5	11:00:00	midday	sunny	NA	Yes	yes	yes
17	female	old females	15	2012-07-10	98.1	279.4	6.41	0.839221	-3.55335	2012-07-24	44	Yes	2	11:00:00	midday	sunny	NA	Yes	yes	yes
22	female	middle-aged females	7	2012-07-17	101.6	114.3	5.38	0.301515	41.8467	2012-07-23	12	No	0	14:00:00	afternoon	sunny	NA	Yes	No	yes
22	web	middle-aged females	7	2012-07-17	101.6	114.3	5.38	0.215592	39.8564	2012-07-23	NA	No	1	10:20:00	midday	sunny	NA	Yes	yes	yes
23	web	old females	10	2012-07-11	130.1	203.9	6.69	0.436169	17.1475	2012-07-20	NA	Yes	1	12:04:00	afternoon	sunny/rainy	NA	Yes	yes	yes
23	female	old females	10	2012-07-11	130.1	203.9	6.69	0.4274	17.0563	2012-07-20	35	Yes	4	15:43:00	afternoon	sunny/rainy	NA	Yes	yes	yes
26	web	middle-aged females	5	2012-07-19	149.4	167.8	7.14	0.118258	18.8567	2012-07-23	NA	No	0	10:20:00	midday	sunny	NA	Yes	No	yes
26	female	middle-aged females	5	2012-07-19	149.4	167.8	7.14	0.0769604	18.0505	2012-07-23	8	Yes	1	14:00:00	afternoon	sunny	NA	Yes	yes	yes
30	web	old females	11	2012-07-13	108.1	151.5	6.47	0.199285	3.74749	2012-07-23	NA	Yes	2	10:20:00	midday	sunny	NA	Yes	yes	yes
30	female	old females	11	2012-07-13	108.1	151.5	6.47	0.206418	4.00587	2012-07-23	41	Yes	4	14:00:00	afternoon	sunny	NA	Yes	yes	yes
33	web	old females	8	2012-07-07	77.3	161.9	5.67	0.484442	4.22012	2012-07-14	NA	No	0	10:33:00	midday	rainy	NA	Yes	No	yes
33	female	old females	8	2012-07-07	77.3	161.9	5.67	0.549403	5.74961	2012-07-14	39	Yes	2	13:23:00	afternoon	rainy	NA	Yes	yes	yes
39	web	middle-aged females	5	2012-07-16	104.6	148.1	6.58	0.146507	-4.0525	2012-07-20	NA	No	0	12:04:00	afternoon	sunny/rainy	NA	Yes	No	yes
39	female	middle-aged females	5	2012-07-16	104.6	148.1	6.58	0.145689	-3.9689	2012-07-20	50	Yes	2	15:43:00	afternoon	sunny/rainy	NA	Yes	yes	yes
46	female	young females	1	2012-07-26	70.3	70.3	6.05	-0.416185	-16.7087	2012-07-26	35	No	0	10:32:00	midday	sunny	NA	Yes	No	yes
46	web	young females	1	2012-07-26	70.3	70.3	6.05	-0.453677	-17.6344	2012-07-26	NA	Yes	1	10:32:00	midday	sunny	NA	Yes	yes	yes
47	female	middle-aged females	3	2012-07-19	88.9	87.2	6.17	-0.242241	-2.99023	2012-07-21	29	Yes	1	10:55:00	midday	windy	NA	Yes	yes	yes
47	web	middle-aged females	3	2012-07-19	88.9	87.2	6.17	-0.27106	-3.72528	2012-07-21	NA	Yes	2	13:53:00	afternoon	windy	NA	Yes	yes	yes
51	female	middle-aged females	6	2012-07-21	67.7	78.4	6.02	-0.296761	-18.0883	2012-07-26	46	No	0	10:32:00	midday	sunny	NA	Yes	No	yes
51	web	middle-aged females	6	2012-07-21	67.7	78.4	6.02	-0.336422	-19.0617	2012-07-26	NA	No	1	10:32:00	midday	sunny	NA	Yes	yes	yes
53	web	old females	10	2012-07-17	59.5	145.9	5.3	0.481563	0.883712	2012-07-26	NA	Yes	2	10:32:00	midday	sunny	NA	Yes	yes	yes
53	female	old females	10	2012-07-17	59.5	145.9	5.3	0.573269	3.0011	2012-07-26	52	Yes	2	10:32:00	midday	sunny	NA	Yes	yes	yes
54	web	old females	11	2012-07-10	72.5	93.9	5.65	-0.0548369	0.201936	2012-07-21	NA	No	0	13:53:00	afternoon	windy	NA	Yes	No	yes
54	female	old females	11	2012-07-10	72.5	93.9	5.65	0.0115689	1.76321	2012-07-21	47	Yes	1	10:55:00	midday	windy	NA	Yes	yes	yes
56	web	old females	14	2012-07-10	52.8	197.9	5.26	0.797342	-4.25266	2012-07-23	NA	Yes	4	10:20:00	midday	sunny	NA	Yes	yes	yes
56	female	old females	14	2012-07-10	52.8	197.9	5.26	0.891939	-2.07171	2012-07-23	53	Yes	3	14:00:00	afternoon	sunny	NA	Yes	yes	yes
1	female	old females	9	2012-07-04	109.7	138	6.53	0.092342	3.16508	2012-07-12	6	Yes	2	11:00:00	midday	rainy	NA	Yes	yes	no
2	female	old females	9	2012-07-04	54.3	81.8	5.43	-0.0503217	-7.48726	2012-07-12	10	No	0	11:00:00	midday	rainy	90	Yes	No	no
2	web	old females	9	2012-07-04	54.3	81.8	5.44	-0.135365	-9.789	2012-07-12	NA	No	0	15:14:00	afternoon	rainy	NA	Yes	No	no
3	female	old females	10	2012-07-03	85.5	241.7	NA	NA	NA	2012-07-12	18	No	0	11:00:00	midday	rainy	72	Yes	No	no
3	web	old females	10	2012-07-03	85.5	241.7	NA	NA	NA	2012-07-12	NA	No	0	15:14:00	afternoon	rainy	NA	Yes	No	no
4	web	old females	9	2012-07-04	57	118.4	NA	NA	NA	2012-07-12	NA	No	0	15:14:00	afternoon	rainy	NA	Yes	No	no
4	female	old females	9	2012-07-04	57	118.4	NA	NA	NA	2012-07-12	28	No	0	11:00:00	midday	rainy	NA	Yes	No	no
7	web	middle-aged females	3	2012-07-19	99	93.5	6.37	-0.255993	-1.44343	2012-07-21	NA	No	0	13:53:00	afternoon	windy	NA	Yes	No	no
7	female	middle-aged females	3	2012-07-19	99	93.5	6.37	-0.241632	-1.02617	2012-07-21	48	No	0	10:55:00	midday	windy	NA	Yes	No	no
10	web	old females	12	2012-07-09	95.2	193.3	6.41	0.45935	-6.80706	2012-07-21	NA	No	0	13:53:00	afternoon	windy	NA	Yes	No	no
10	female	old females	12	2012-07-09	95.2	193.3	6.41	0.47082	-6.45335	2012-07-21	51	No	0	10:55:00	midday	windy	NA	Yes	No	no
11	female	young females	2	2012-07-11	119.2	96.9	NA	NA	NA	2012-07-12	2	No	0	11:00:00	midday	rainy	94	Yes	No	no
11	web	young females	2	2012-07-11	119.2	96.9	NA	NA	NA	2012-07-12	NA	No	0	15:14:00	afternoon	rainy	NA	Yes	No	no
14	web	middle-aged females	4	2012-07-11	123.8	135.4	6.63	0.0431802	13.193	2012-07-14	NA	No	0	10:33:00	midday	rainy	NA	Yes	No	no
14	female	middle-aged females	4	2012-07-11	123.8	135.4	6.7	0.0145461	10.3495	2012-07-14	27	No	0	13:23:00	afternoon	rainy	NA	Yes	No	no
15	web	middle-aged females	4	2012-07-09	144.9	194.6	7.07	0.285573	17.093	2012-07-12	NA	No	0	15:14:00	afternoon	rainy	NA	Yes	No	no
19	web	young females	2	2012-07-11	145.7	139.3	NA	NA	NA	2012-07-12	NA	No	0	15:14:00	afternoon	rainy	NA	Yes	No	no
19	female	young females	2	2012-07-11	145.7	139.3	NA	NA	NA	2012-07-12	16	Yes	1	11:00:00	midday	rainy	56	No	No	no
20	female	middle-aged females	3	2012-07-10	73.4	71.8	5.65	-0.256777	2.66321	2012-07-12	5	Yes	1	11:00:00	midday	rainy	NA	Yes	yes	no
21	web	middle-aged females	6	2012-07-18	103.8	106	NA	NA	NA	2012-07-23	NA	No	0	10:20:00	midday	sunny	NA	Yes	No	no
25	female	middle-aged females	5	2012-07-08	105.8	163.8	NA	NA	NA	2012-07-12	4	No	0	11:00:00	midday	rainy	78	Yes	No	no
25	web	middle-aged females	5	2012-07-08	105.8	163.8	NA	NA	NA	2012-07-12	NA	No	0	15:14:00	afternoon	rainy	NA	Yes	No	no
28	female	middle-aged females	7	2012-07-08	61.7	121.2	5.37	NA	NA	2012-07-14	58	No	0	13:23:00	afternoon	rainy	39	No	No	no
28	web	middle-aged females	7	2012-07-08	61.7	121.2	5.37	0.276942	0.347357	2012-07-14	NA	No	0	10:33:00	midday	rainy	NA	Yes	No	no
31	female	middle-aged females	6	2012-07-07	86.4	138.3	NA	NA	NA	2012-07-12	15	No	0	11:00:00	midday	rainy	NA	Yes	No	no
31	web	middle-aged females	6	2012-07-07	86.4	138.3	NA	NA	NA	2012-07-12	NA	No	0	15:14:00	afternoon	rainy	NA	Yes	No	no
32	female	middle-aged females	4	2012-07-17	80.1	120.2	NA	NA	NA	2012-07-20	34	No	0	15:43:00	afternoon	sunny/rainy	NA	Yes	No	no
32	web	middle-aged females	4	2012-07-17	80.1	120.2	5.96	0.107319	-4.31621	2012-07-20	NA	No	0	12:04:00	afternoon	sunny/rainy	NA	Yes	No	no
34	web	young females	2	2012-07-19	92	86.8	6.57	-0.385039	-16.2616	2012-07-20	NA	No	0	12:04:00	afternoon	sunny/rainy	NA	Yes	No	no
35	web	young females	1	2012-07-21	96	96	6.25	-0.196792	0.247462	2012-07-21	NA	No	0	13:53:00	afternoon	windy	NA	Yes	No	no
35	female	young females	1	2012-07-21	96	96	6.25	-0.173757	0.855396	2012-07-21	55	No	0	10:55:00	midday	windy	NA	Yes	No	no
36	web	old females	17	2012-07-07	68.4	198.4	NA	NA	NA	2012-07-23	NA	No	0	10:20:00	midday	sunny	NA	Yes	No	no
40	female	old females	8	2012-07-07	82.2	133.4	5.2	NA	NA	2012-07-14	34	No	0	13:23:00	afternoon	rainy	43	No	No	no
40	web	old females	8	2012-07-07	82.2	133.4	5.2	0.41934	27.4928	2012-07-14	NA	Yes	1	10:33:00	midday	rainy	NA	Yes	yes	no
41	female	young females	1	2012-07-12	121.1	121.1	7	-0.200792	-4.55437	2012-07-12	40	No	0	11:00:00	midday	rainy	NA	Yes	No	no
41	web	young females	1	2012-07-12	121.1	121.1	7	-0.169615	-3.97063	2012-07-12	NA	No	0	15:14:00	afternoon	rainy	NA	Yes	No	no
44	web	middle-aged females	6	2012-07-19	57.4	58.7	5.48	-0.47814	-8.25263	2012-07-24	NA	No	0	11:00:00	midday	sunny	NA	Yes	No	no
44	female	middle-aged females	6	2012-07-19	57.4	58.7	5.48	-0.399446	-6.42124	2012-07-24	21	No	0	11:00:00	midday	sunny	NA	Yes	No	no
45	web	young females	2	2012-07-22	118.3	120.5	NA	NA	NA	2012-07-23	NA	No	0	10:20:00	midday	sunny	NA	Yes	No	no
45	female	young females	2	2012-07-22	118.3	120.5	NA	NA	NA	2012-07-23	19	Yes	1	14:00:00	afternoon	sunny	97	Yes	No	no
50	female	young females	2	2012-07-19	89.5	92.5	6.4	-0.262757	-11.7466	2012-07-20	27	No	0	15:43:00	afternoon	sunny/rainy	NA	Yes	No	no
50	web	young females	2	2012-07-19	89.5	92.5	6.36	-0.264012	-10.5525	2012-07-20	NA	No	0	12:04:00	afternoon	sunny/rainy	NA	Yes	No	no
52	female	young females	2	2012-07-22	94.6	90.4	6.4	-0.285721	-6.64656	2012-07-23	13	No	0	14:00:00	afternoon	sunny	NA	Yes	No	no
52	web	young females	2	2012-07-22	94.6	90.4	6.4	-0.297914	-7.01616	2012-07-23	NA	No	0	10:20:00	midday	sunny	NA	Yes	No	no
55	female	young females	2	2012-07-20	66.7	64.6	5.77	-0.403936	-8.91835	2012-07-21	52	No	0	10:55:00	midday	windy	NA	Yes	No	no
55	web	young females	2	2012-07-20	66.7	64.6	5.77	-0.461667	-10.289	2012-07-21	NA	No	0	13:53:00	afternoon	windy	NA	Yes	No	no
57	web	young females	2	2012-07-23	103.8	100.3	6.4	-0.193993	2.18384	2012-07-24	NA	No	0	11:00:00	midday	sunny	NA	Yes	No	no
57	female	young females	2	2012-07-23	103.8	100.3	6.4	-0.1818	2.55344	2012-07-24	50	No	0	11:00:00	midday	sunny	NA	Yes	No	no
58	female	young females	2	2012-07-13	41.6	39.5	5	-0.629631	-2.695	2012-07-14	32	No	0	13:23:00	afternoon	rainy	NA	Yes	No	no
58	web	young females	2	2012-07-13	41.6	39.5	5	-0.743021	-5.28905	2012-07-14	NA	No	0	10:33:00	midday	rainy	NA	Yes	No	no
59	female	young females	2	2012-07-22	69.3	65.8	5.63	-0.337127	-0.623198	2012-07-23	22	No	0	14:00:00	afternoon	sunny	NA	Yes	No	no
59	web	young females	2	2012-07-22	69.3	65.8	5.63	-0.404978	-2.21625	2012-07-23	NA	No	0	10:20:00	midday	sunny	NA	Yes	No	no
